# Supplementary material
Source: Springer Nature journal article supplement (http://www.springermedizin.de/resource/supplementary/12937_2010_305_MOESM4_ESM.pdf/25654828)

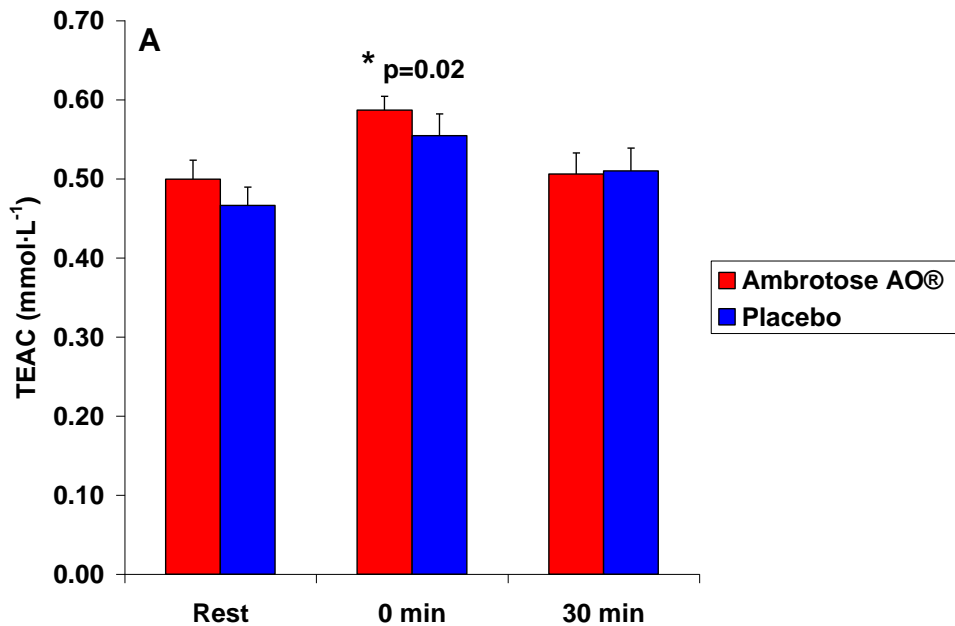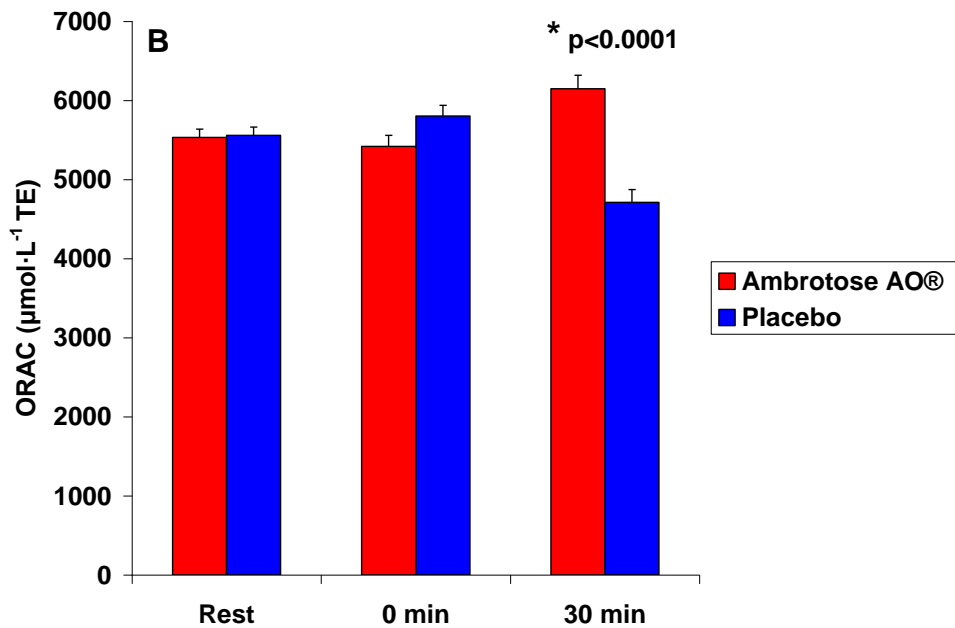

Supplement: MOESM4 [file 25654828]
